# Supplementary material
Source: PubMed Central journal article supplement (PMC3248006)
Supplement: supp_M111.295832_jbc.M111.295832-1.pdf [file supp_M111.295832_jbc.M111.295832-1.pdf]

**Table S1.** Strains and plasmids used in this study. Trmp<sup>R</sup>, trimethoprim resistance; Spec<sup>R</sup>, spectinomycin resistance; Ery<sup>R</sup>, erythromycin resistance; Tet<sup>R</sup>, tetracycline resistance; Cm<sup>R</sup>, chloramphenicol resistance; Amp<sup>R</sup>, ampicillin resistance.

| Strain/plasmid       | Description                                                                        | Reference or source          |
|----------------------|------------------------------------------------------------------------------------|------------------------------|
| <i>S. pneumoniae</i> |                                                                                    |                              |
| D39                  | Serotype 2 strain, <i>cps2</i>                                                     | (1), lab. Pub. Of P. Hermans |
| D39 <i>nisRK</i>     | D39 <i>ΔbgaA::nisRK</i> ; Trmp <sup>R</sup>                                        | (2)                          |
| AS1                  | D39 <i>ΔargR1</i>                                                                  | This work                    |
| AS2                  | D39 <i>ΔahrC</i>                                                                   | This work                    |
| AS3                  | D39 <i>ΔargR1 ΔahrC</i>                                                            | This work                    |
| AS4                  | D39 <i>ΔabpA</i>                                                                   | This work                    |
| AS5                  | D39 <i>ΔartP</i>                                                                   | This work                    |
| AS6                  | D39 <i>ΔaacA</i> ; Spec <sup>R</sup>                                               | This work                    |
| AS7                  | D39 <i>ΔabpB</i> ; Spec <sup>R</sup>                                               | This work                    |
| AS8                  | D39 <i>ΔaliB</i> ; Ery <sup>R</sup>                                                | This work                    |
| AS9                  | D39 <i>ΔabpA ΔartP</i>                                                             | This work                    |
| AS10                 | D39 <i>ΔabpA ΔabpB</i> ; Spec <sup>R</sup>                                         | This work                    |
| AS11                 | D39 <i>ΔabpB ΔartP</i> ; Spec <sup>R</sup>                                         | This work                    |
| AS12                 | D39 <i>ΔabpA ΔartP ΔabpB</i> ; Spec <sup>R</sup>                                   | This work                    |
| AS13                 | D39 <i>ΔabpA ΔartP ΔabpB</i> ; Spec <sup>R</sup> <i>ΔaliB</i> ; Ery <sup>R</sup>   | This work                    |
| AS14                 | D39 <i>ΔartP</i> D39 <i>ΔaacA</i> ; Spec <sup>R</sup>                              | This work                    |
| AS15                 | D39 <i>ΔbgaA::PabpA-lacZ</i> ; Tet <sup>R</sup> Spec <sup>R</sup>                  | This work                    |
| AS16                 | D39 <i>ΔargR1 ΔbgaA::PabpA-lacZ</i> ; Tet <sup>R</sup> Spec <sup>R</sup>           | This work                    |
| AS17                 | D39 <i>ΔahrC ΔbgaA::PabpA-lacZ</i> ; Tet <sup>R</sup> Spec <sup>R</sup>            | This work                    |
| AS18                 | D39 <i>ΔargR1 ΔahrC ΔbgaA::PabpA-lacZ</i> ; Tet <sup>R</sup> Spec <sup>R</sup>     | This work                    |
| AS19                 | D39 <i>ΔbgaA::PartP-lacZ</i> ; Tet <sup>R</sup> Spec <sup>R</sup>                  | This work                    |
| AS20                 | D39 <i>ΔargR1 ΔbgaA::PartP-lacZ</i> ; Tet <sup>R</sup> Spec <sup>R</sup>           | This work                    |
| AS21                 | D39 <i>ΔahrC ΔbgaA::PartP-lacZ</i> ; Tet <sup>R</sup> Spec <sup>R</sup>            | This work                    |
| AS22                 | D39 <i>ΔargR1 ΔahrC ΔbgaA::PartP-lacZ</i> ; Tet <sup>R</sup> Spec <sup>R</sup>     | This work                    |
| AS23                 | D39 <i>ΔbgaA::PaapA-lacZ</i> ; Tet <sup>R</sup> Spec <sup>R</sup>                  | This work                    |
| AS24                 | D39 <i>ΔargR1 ΔbgaA::PaapA-lacZ</i> ; Tet <sup>R</sup> Spec <sup>R</sup>           | This work                    |
| AS25                 | D39 <i>ΔahrC ΔbgaA::PaapA-lacZ</i> ; Tet <sup>R</sup> Spec <sup>R</sup>            | This work                    |
| AS26                 | D39 <i>ΔargR1 ΔahrC ΔbgaA::PaapA-lacZ</i> ; Tet <sup>R</sup> Spec <sup>R</sup>     | This work                    |
| AS27                 | D39 <i>ΔbgaA::PabpB-lacZ</i> ; Tet <sup>R</sup> Spec <sup>R</sup>                  | This work                    |
| AS28                 | D39 <i>ΔargR1 ΔbgaA::PabpB-lacZ</i> ; Tet <sup>R</sup> Spec <sup>R</sup>           | This work                    |
| AS29                 | D39 <i>ΔahrC ΔbgaA::PabpB-lacZ</i> ; Tet <sup>R</sup> Spec <sup>R</sup>            | This work                    |
| AS30                 | D39 <i>ΔargR1 ΔahrC ΔbgaA::PabpB-lacZ</i> ; Tet <sup>R</sup> Spec <sup>R</sup>     | This work                    |
| AS31                 | D39 <i>ΔbgaA::PaliB-lacZ</i> ; Tet <sup>R</sup> Spec <sup>R</sup>                  | This work                    |
| AS32                 | D39 <i>ΔargR1 ΔbgaA::PaliB-lacZ</i> ; Tet <sup>R</sup> Spec <sup>R</sup>           | This work                    |
| AS33                 | D39 <i>ΔahrC ΔbgaA::PaliB-lacZ</i> ; Tet <sup>R</sup> Spec <sup>R</sup>            | This work                    |
| AS34                 | D39 <i>ΔargR1 ΔahrC ΔbgaA::PaliB-lacZ</i> ; Tet <sup>R</sup> Spec <sup>R</sup>     | This work                    |
| AS35                 | D39 <i>ΔbgaA::PabpA-mut-lacZ</i> ; Tet <sup>R</sup> Spec <sup>R</sup>              | This work                    |
| AS36                 | D39 <i>ΔargR1 ΔbgaA::PabpA-mut-lacZ</i> ; Tet <sup>R</sup> Spec <sup>R</sup>       | This work                    |
| AS37                 | D39 <i>ΔbgaA::PartP-mut-lacZ</i> ; Tet <sup>R</sup> Spec <sup>R</sup>              | This work                    |
| AS38                 | D39 <i>ΔargR1 ΔbgaA::PartP-mut-lacZ</i> ; Tet <sup>R</sup> Spec <sup>R</sup>       | This work                    |
| AS39                 | D39 <i>ΔbgaA::PabpB-mut-lacZ</i> ; Tet <sup>R</sup> Spec <sup>R</sup>              | This work                    |
| AS40                 | D39 <i>ΔargR1 ΔbgaA::PabpB-mut-lacZ</i> ; Tet <sup>R</sup> Spec <sup>R</sup>       | This work                    |
| AS41                 | D39 <i>ΔbgaA::PaliB-mut-lacZ</i> ; Tet <sup>R</sup> Spec <sup>R</sup>              | This work                    |
| AS42                 | D39 <i>ΔargR1 ΔbgaA::PaliB-mut-lacZ</i> ; Tet <sup>R</sup> Spec <sup>R</sup>       | This work                    |
| AS43                 | D39 <i>ΔbgaA::ParcA-lacZ</i> ; Tet <sup>R</sup> Spec <sup>R</sup>                  | This work                    |
| AS44                 | D39 <i>ΔargR1 ΔbgaA::ParcA-lacZ</i> ; Tet <sup>R</sup> Spec <sup>R</sup>           | This work                    |
| AS45                 | D39 <i>ΔahrC ΔbgaA::ParcA-lacZ</i> ; Tet <sup>R</sup> Spec <sup>R</sup>            | This work                    |
| AS46                 | D39 <i>ΔargR1 ΔahrC ΔbgaA::ParcA-lacZ</i> ; Tet <sup>R</sup> Spec <sup>R</sup>     | This work                    |
| AS47                 | D39 <i>ΔbgaA::Parc-mut-lacZ</i> ; Tet <sup>R</sup> Spec <sup>R</sup>               | This work                    |
| AS48                 | D39 <i>ΔargR1 ΔbgaA::ParcA-mut-lacZ</i> ; Tet <sup>R</sup> Spec <sup>R</sup>       | This work                    |
| AS49                 | D39 <i>ΔahrC ΔbgaA::ParcA-mut-lacZ</i> ; Tet <sup>R</sup> Spec <sup>R</sup>        | This work                    |
| AS50                 | D39 <i>ΔargR1 ΔahrC ΔbgaA::ParAc-mut-lacZ</i> ; Tet <sup>R</sup> Spec <sup>R</sup> | This work                    |
| <i>L. lactis</i>     |                                                                                    |                              |
| NZ9000               | MG1363 <i>ΔpepN::nisRK</i>                                                         | (3)                          |
| <i>E. coli</i>       |                                                                                    |                              |

|          |                                                                                                                                                                           |                       |
|----------|---------------------------------------------------------------------------------------------------------------------------------------------------------------------------|-----------------------|
| EC1000   | Km <sup>R</sup> ; MC1000 derivative carrying a single copy of the pWV01 <i>repA</i> gene in <i>glgB</i>                                                                   | (4)                   |
| Plasmids |                                                                                                                                                                           |                       |
| pNZ8048  | Cm <sup>R</sup> ; Nisin-inducible <i>PnisA</i>                                                                                                                            | (5)                   |
| pNG8048E | Cm <sup>R</sup> Ery <sup>R</sup> ; Nisin-inducible <i>PnisA</i> , pNZ8048 derivative containing <i>ery<sup>R</sup></i> gene to facilitate cloning                         | Laboratory collection |
| pORI280  | Em <sup>R</sup> ; <i>ori<sup>+</sup> repA<sup>+</sup></i> ; deletion derivative of pWV01; constitutive <i>lacZ</i> expression from P32 promoter                           | (4)                   |
| pPP2     | Amp <sup>R</sup> Tet <sup>R</sup> ; promoter-less <i>lacZ</i> . For replacement of <i>bgaA</i> ( <i>spr0565</i> ) with promoter- <i>lacZ</i> fusions. Derivative of pTP1. | (6)                   |
| pAS1     | pORI280 <i>ΔargR1</i>                                                                                                                                                     | This work             |
| pAS2     | pORI280 <i>ΔahrC</i>                                                                                                                                                      | This work             |
| pAS3     | pORI280 <i>ΔabpA</i>                                                                                                                                                      | This work             |
| pAS4     | pORI280 <i>ΔartP</i>                                                                                                                                                      | This work             |
| pAS5     | pPP2 <i>PabpA-lacZ</i>                                                                                                                                                    | This work             |
| pAS6     | pPP2 <i>PartP-lacZ</i>                                                                                                                                                    | This work             |
| pAS7     | pPP2 <i>PaapA-lacZ</i>                                                                                                                                                    | This work             |
| pAS8     | pPP2 <i>PabpB-lacZ</i>                                                                                                                                                    | This work             |
| pAS9     | pPP2 <i>PaliB-lacZ</i>                                                                                                                                                    | This work             |
| pAS10    | pPP2 <i>PabpA-mut-lacZ</i>                                                                                                                                                | This work             |
| pAS11    | pPP2 <i>PartP-mut-lacZ</i>                                                                                                                                                | This work             |
| pAS12    | pPP2 <i>PabpB-mut-lacZ</i>                                                                                                                                                | This work             |
| pAS13    | pPP2 <i>PaliB-mut-lacZ</i>                                                                                                                                                | This work             |
| pAS13    | pPP2 <i>ParcA-lacZ</i>                                                                                                                                                    | This work             |
| pAS14    | pPP2 <i>ParcA-mut-lacZ</i>                                                                                                                                                | This work             |
| pAS15    | pNG8048E carrying <i>strep-ahrC</i> downstream of <i>PnisA</i>                                                                                                            | This work             |
| pAS16    | pNG8048E carrying <i>strep-argR1</i> downstream of <i>PnisA</i>                                                                                                           | This work             |

**Table S2.** Oligonucleotide primers used in this study.

| Name           | Nucleotide sequence (5' to 3');<br>restriction enzyme sites underlined | Restriction site |
|----------------|------------------------------------------------------------------------|------------------|
| ahrC_D39_KO1   | TGCTCTAGATAAGGAAAGAGTGGATGTAC                                          | XbaI             |
| ahrC_D39_KO2   | CTCTTTTTTATTCATTTTTAAATTG                                              | -                |
| ahrC_D39_KO3   | TAAAAAATGAATAAAAAAGAGGAACAAGTAAAAAATTGGTAGG                            | -                |
| ahrC_D39_KO4   | GAAGATCTACTCTCGACACTTCCATG                                             | BglII            |
| argR_KO-1      | TGCTCTAGACCATTGCGCGCTTCTTCATCC                                         | XbaI             |
| argR_KO-2      | CGGGATCCTTTATTAAGTATGACGATCTC                                          | BamHI            |
| argR_KO-3      | CATGCCATGGGTAAGGTCTTGGGAGTTGC                                          | NcoI             |
| argR_KO-4      | GAAGATCTGGTCGCATAATCCATCTGC                                            | BglII            |
| Pspd_0109_1    | CGGAATTCATTGAATTGGGCGAGGG                                              | EcoRI            |
| Pspd_0109_2    | CGGGATCCAGCATCTAAACCAAAC                                               | BamHI            |
| SPD_0109_KO1   | TGCTCTAGAGATTTTAGAGAGAGTAGG                                            | XbaI             |
| SPD_0109_KO2   | CCCAGACTCCTTCAACTTCATCGTCATCAACACCTTC                                  | -                |
| SPD_0109_KO3   | AAGTTGAAGGAGTCTGGGG                                                    | -                |
| SPD_0109_KO4   | CGGAATTCACGAACTGGAGCAATCAC                                             | EcoRI            |
| Pspd_0109_mut1 | GGGTAAAAAAGAATAAACATAAAG                                               | -                |
| Pspd_0109_mut2 | CTTTATGTTTATTCTTTTTACCCTATAAATAACTCCTATAC                              | -                |
| Pspd_0109_2.2  | CGGGATCCGATGGCTTCAATTCCAGCC                                            | BamHI            |
| Pspd_0719_1    | CGGAATTCGCCATCGTTTGCCATTGC                                             | EcoRI            |
| Pspd_0719_2    | CGGGATCCCCAAAAAGATAACACAG                                              | BamHI            |
| Pspd_0719_mut1 | GGGAACATGTTATAATCATAACAG                                               | -                |
| Pspd_0719_mut2 | CTGTATGATTATAACATGTTCCCAATTAATAATTTAAATTTTTATCC                        | -                |
| SPD_719KO_1    | TGCTCTAGACTCATTATAACAGGATTGG                                           | XbaI             |
| SPD_719KO_2    | CCCATAGTTAAAATAAAGG                                                    | -                |
| SPD_719KO_3    | CCTTATTTTAACTATGGGGCCTCTATTCTGACAGTAGC                                 | -                |
| SPD_719KO_4    | GAAGATCTCAAGGTCTTGCATAACAGCC                                           | BglII            |
| Pspd_0887-1    | CGGAATTCCTTGATATATAAGGGTTC                                             | EcoRI            |
| Pspd_0887-2    | CGGGATCCCCATGGCTCCAATACC                                               | BamHI            |
| SPD_0887-KO1   | TCCTACAGAATATTTAATTG                                                   | -                |
| SPD_0887-KO2   | TCCTCCTCACTATTTTGATTAGCTGTTTATCTAAACTAAC                               | -                |
| SPD_0887-KO3   | CGTTTTAGCGTTTATTTCTGTTTAGTGCTATAAGCATTCTACC                            | -                |
| SPD_0887-KO4   | CAGAAGCCTCTAAGACC                                                      | -                |

|                  |                                                                 |             |
|------------------|-----------------------------------------------------------------|-------------|
| Pspd_1226_1      | CGGAATTCAAACAGGTAAGATTGTCG                                      | EcoRI       |
| Pspd_1226_2      | CGGGATCCCTAAGAAGAACTTGCAAG                                      | BamHI       |
| Pspd_1226_mut1   | GGGAATTAACAGAGAGGTTGTTTATTATG                                   | EcoRI       |
| Pspd_1226_mut2   | AACAACCTCTCTGTTAATTCCTATAATTATAACGATATC                         | -           |
| Pspd_1226_2.2    | CGGGATCCAATGGCCTCAACAGCTGAC                                     | BamHI       |
| SPD_1226_KO1     | TGCTCTAGAGCATCCCAGCTGTAGAGG                                     | -           |
| SPD_1226_KO2     | TCCTCCTCACTATTTTGATTAGGAACTTGCAAGAAAATTAC                       | -           |
| SPD_1226_KO3     | CGTTTTAGCGTTTATTTCGTTTTAGTCTAACTGAAGTTGAAGAATAAG                | -           |
| SPD_1226_KO4     | CAAACCTTCCACTATCTTG                                             | -           |
| Pspd_1357_1      | CGGAATTC AATCTTTTAGGAGAACTTG                                    | EcoRI       |
| Pspd_1357_2      | CGGGATCCCCAAGGTTAGATATTTGC                                      | BamHI       |
| Pspd_1357_mut1   | GGGATATTTAAAGCAGGAGG                                            | -           |
| Pspd_1357_mut2   | CCTGCTTTAAATATCCCTTTTATTATACAACCTCTGGG                          | -           |
| Pspd_1357_2.2    | CGGGATCCCAGTGCTAGAATTTCCAC                                      | BamHI       |
| SPD_1357_KO-1    | TTAATCAGTTTGCTGACC                                              | -           |
| SPD_1357_KO-2    | GAGATCTAATCGATGCATGCGCCAAGGTTAGATATTTGC                         | -           |
| SPD_1357_KO-3    | AGTTATCGGCATAATCGTTAAGCTAGAGAAAAATGGTTG                         | -           |
| SPD_1357_KO-4    | AGAAGTCAACTCCCC                                                 | -           |
| AhrC_OX_1_strep  | CGAGCCATCATGAGCGCTTGGAGCCATCCACAATTTGAAAAAATAAAAAAGAGAGACTTG    | RcaI        |
| AhrC_OX_2        | TGCTCTAGACAAGTAACATATAGACCTACC                                  | XbaI        |
| ArgR1_OX_1_strep | CGAGCCATCATGAGCGCTTGGAGCCATCCACAATTTGAAAAAAGAAAAAGAGATCGTCATCAG | RcaI        |
| ArgR1_OX_2       | TGCTCTAGAGAGCAACTCCCAAGACCTTAC                                  | XbaI        |
| Pspd_1049-1      | CGGGATCCATCACCTCTTCTCC                                          | BamHI       |
| Pspd_1049-2      | TGCTCTAGATGAAGCAGCAGCTCGCG                                      | XbaI        |
| RNlacZ-fw        | GGTTTTCCCAGTCACGACGTTGTAA                                       | -           |
| Eryfor           | TAACGATTATGCCGATAACT                                            | -           |
| Eryrev           | GCATGCATCGATTAGATCTC                                            | -           |
| Spec_Fp          | CTAATCAAAATAGTGAGGAGG                                           | -           |
| Spec_Rp          | ACTAAACGAAATAAACGC                                              | -           |
| ParcA_ccpA_mut-1 | CGGAATTCGCGGTTTGATTTTCTTCATC                                    | EcoRI       |
| ParcA_ccpA_mut-2 | GGCACCATTTGGGTACAAATTACATGTATATTATAACGC                         | -           |
| ParcA_ccpA_mut-3 | TTTGTACCCAAAATGGTGCCAAGTC                                       | -           |
| ParcA_ccpA_mut-4 | CGGGATCCCTGGACGGTGCAACATAAC                                     | BamHI       |
| <b>qRT-PCR</b>   |                                                                 | <b>gene</b> |
| metG_D39-1       | ATCCGTACAACCTGATGAC                                             | <i>metG</i> |
| metG-D39-2       | TTCTGCCAGCTGGCTTTC                                              |             |
| Spd_0109-qRT-1   | GACAAATGTAAGTGGCTAGCG                                           | <i>abpA</i> |
| Spd_0109-qRT-2   | TTTGCAGTATAGTAGGGAGTTG                                          |             |
| Spd_0719-qRT-1   | GCTCCGACTATTCAGATTGG                                            | <i>artP</i> |
| Spd_0719-qRT-2   | CGGCACGAACAATCTCC                                               |             |
| Spd_0887-qRT-1   | CTGCCTTGTGTGTGGG                                                | <i>aapA</i> |
| Spd_0887-qRT-1   | TAACCAACCAGCCAACC                                               |             |
| Spd_1226-qRT-1   | GGTTAAGTTGGAAATCTCAAGC                                          | <i>abpB</i> |
| Spd_1226-qRT-2   | CAAAGACTTCTTTCTCTCGTC                                           |             |
| Spd_1357-qRT-1   | CATCATTAGCAGAGGATTGG                                            | <i>aliB</i> |
| Spd_1357-qRT-2   | GCATATTCTTCTCCCTCAGAAG                                          |             |

**Table S3.** Results of qRT-PCRs for *abpA*, *abpB*, *aapA*, *aliB* and *artP* on RNA (isolated as described in the Experimental Procedures) from D39 wild-type grown in CDM containing either 0.05 mM or 10 mM arginine, and from the *argR*, *ahrC* and *argR1ahrC* mutants grown in CDM containing 10 mM arginine. The procedure as described by Carvalho *et al.* (7) was followed. The data were normalized to the level of *metG* (*spd\_0689*), which was unchanged across all microarray conditions. Primers used are listed in Table S2. Values are the averages of three measurements. Standard deviations are in parentheses.

| ratio                  | gene              |                  |                  |                  |                  |
|------------------------|-------------------|------------------|------------------|------------------|------------------|
|                        | <i>abpA</i>       | <i>artP</i>      | <i>aapA</i>      | <i>abpB</i>      | <i>aliB</i>      |
| D39 0.05 mM/D39 10 mM  | <b>8.9</b> (1.1)  | <b>1.7</b> (0.2) | <b>1.6</b> (0.1) | <b>2.2</b> (0.1) | <b>2.1</b> (0.2) |
| <i>argR1</i> /D39      | <b>33.7</b> (1.1) | <b>1.9</b> (0.1) | <b>1.9</b> (0.1) | <b>3.0</b> (0.3) | <b>3.2</b> (0.3) |
| <i>ahrC</i> /D39       | <b>36.2</b> (4.9) | <b>2.1</b> (0.3) | <b>2.2</b> (0.1) | <b>5.5</b> (0.7) | <b>3.3</b> (0.1) |
| <i>argR1-ahrC</i> /D39 | <b>39.4</b> (5.5) | <b>2.0</b> (0.1) | <b>2.1</b> (0.2) | <b>5.8</b> (0.3) | <b>3.7</b> (0.2) |

**Table S4.** Specific activity (Miller Units) of the indicated promoter-*lacZ* fusions in different media. Fig. 4A presents a bar diagram of these data. See legend of Fig. 4A for more details.

| strain         | Miller Units |       |           | Standard Deviation |       |           |
|----------------|--------------|-------|-----------|--------------------|-------|-----------|
|                | GMI7         | CDM10 | CDM 0.025 | GMI7               | CDM10 | CDM 0.025 |
| wt <i>abpA</i> | 0.6          | 0.8   | 3.5       | 0.1                | 0.2   | 0.5       |
| R <i>abpA</i>  | 101.0        | 93.0  | 127.0     | 14.0               | 17.0  | 21.0      |
| C <i>abpA</i>  | 112.0        | 109.0 | 136.0     | 16.0               | 12.0  | 17.0      |
| RC <i>abpA</i> | 129.0        | 112.0 | 116.0     | 17.0               | 11.0  | 13.0      |
| wt <i>artP</i> | 13.0         | 19.0  | 38.0      | 2.0                | 2.5   | 4.0       |
| R <i>artP</i>  | 76.0         | 74.0  | 80.0      | 10.0               | 8.0   | 11.0      |
| C <i>artP</i>  | 82.0         | 92.0  | 91.0      | 12.0               | 11.0  | 9.0       |
| RC <i>artP</i> | 74.0         | 90.0  | 104.0     | 14.0               | 9.0   | 16.0      |
| wt <i>aapA</i> | 4.2          | 7.0   | 12.5      | 0.8                | 1.0   | 1.5       |
| R <i>aapA</i>  | 32.0         | 33.0  | 29.0      | 4.0                | 5.0   | 3.0       |
| C <i>aapA</i>  | 38.0         | 32.0  | 30.0      | 6.0                | 4.0   | 5.0       |
| RC <i>aapA</i> | 43.0         | 42.0  | 38.0      | 5.0                | 4.0   | 7.0       |
| wt <i>abpB</i> | 14.0         | 23.0  | 62.0      | 2.5                | 4.0   | 4.0       |
| R <i>abpB</i>  | 374.0        | 363.0 | 389.0     | 29.0               | 32.0  | 43.0      |
| C <i>abpB</i>  | 401.0        | 430.0 | 480.0     | 34.0               | 57.0  | 77.0      |
| RC <i>abpB</i> | 438.0        | 395.0 | 405.0     | 63.0               | 50.0  | 41.0      |
| wt <i>aliB</i> | 51.0         | 76.0  | 119.0     | 8.0                | 5.0   | 11.0      |
| R <i>aliB</i>  | 197.0        | 170.0 | 182.0     | 28.0               | 22.0  | 20.0      |
| C <i>aliB</i>  | 245.0        | 183.0 | 193.0     | 34.0               | 17.0  | 17.0      |
| RC <i>aliB</i> | 171.0        | 190.0 | 168.0     | 18.0               | 26.0  | 19.0      |

## Reference List

1. Avery, O. T., Macleod, C. M., and McCarty, M. (1944) *Mol. Med.* **1**, 344-365
2. Kloosterman, T. G., Bijlsma, J. J. E., Kok, J., and Kuipers, O. P. (2006) *Microbiology* **152**, 351-359
3. Kuipers, O. P., Ruyter, P. G., Kleerebezem, M., and Vos, W. M. (1998) *J. Biotechnol.* **64**, 15-21
4. Leenhouts, K., Buist, G., Bolhuis, A., ten Berge, A., Kiel, J., Mierau, I., Dabrowska, M., Venema, G., and Kok, J. (1996) *Mol. Gen. Genet.* **253**, 217-224
5. de Ruyter, P. G., Kuipers, O. P., and de Vos, W. M. (1996) *Appl. Environ. Microbiol.* **62**, 3662-3667
6. Kovacs, M., Halfmann, A., Fedtke, I., Heintz, M., Peschel, A., Vollmer, W., Hakenbeck, R., and Bruckner, R. (2006) *J. Bacteriol.* **188**, 5797-5805
7. Carvalho, S. M., Kloosterman, T. G., Kuipers, O. P., and Neves, A. R. (2011) CcpA ensures optimal metabolic fitness of *Streptococcus pneumoniae* D39.
